# Supplementary material for: The Effect of Alkyl Substitution of Novel Imines on Their Supramolecular Organization, towards Photovoltaic Applications
Source: PubMed Central journal article supplement (PMC8036393; doi:10.3390/polym13071043), 2021-03-26
Supplement: polymers-13-01043-s001.pdf [file polymers-13-01043-s001.pdf]

# Supplementary Information

## The effect of alkyl substitution of novel imines on their supramolecular organization, towards photovoltaic applications

Paweł Nitschke<sup>1</sup>, Bożena Jarzabek<sup>1\*</sup>, Marharyta Vasylieva<sup>1, 2</sup>, Marcin Godzierz<sup>1</sup>, Henryk Janeczek<sup>1</sup>, Marta Musioł<sup>1</sup>, Adrian Domański<sup>1</sup>

<sup>1</sup>Centre of Polymer and Carbon Materials, Polish Academy of Sciences, 34 M. Curie-Skłodowska Str., 41-819 Zabrze, Poland  
bozena.jarzabek@cmpw-pan.edu.pl (B.J.); pnitschke@cmpw-pan.edu.pl (P.N.); mvasylieva@cmpw-pan.edu.pl (M.V.);  
mgodzierz@cmpw-pan.edu.pl (M.G.); hjaneczek@cmpw-pan.edu.pl (H.J.); mmusiol@cmpw-pan.edu.pl (M.M.);  
adominski@cmpw-pan.edu.pl (A.D.)

<sup>2</sup>Silesian University of Technology, Faculty of Chemistry, 9 Strzody Str., 44-100 Gliwice, Poland

\*Correspondence: bozena.jarzabek@cmpw-pan.edu.pl;

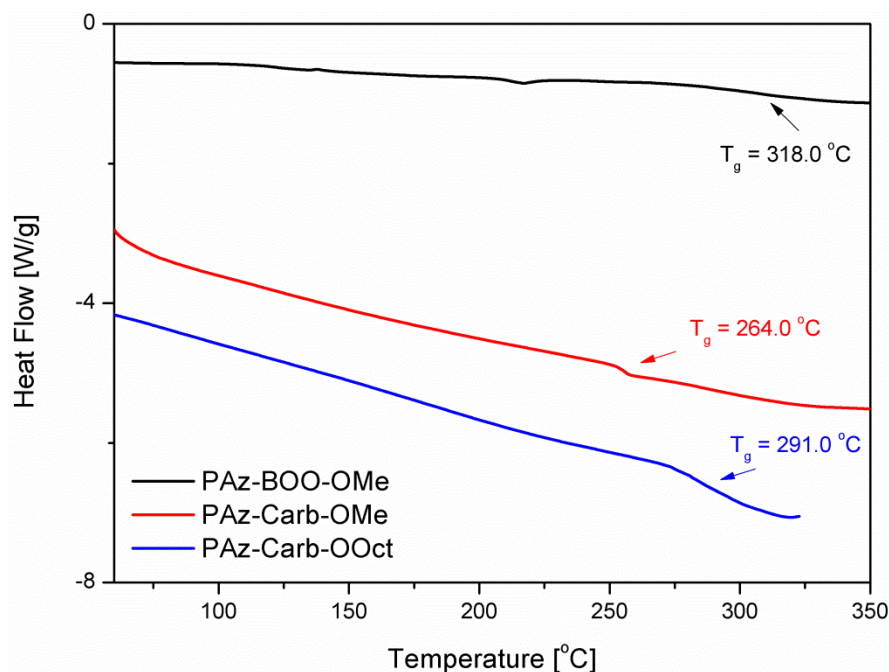

**Figure S1.** DSC curves obtained during the second heating stage of investigated compounds.

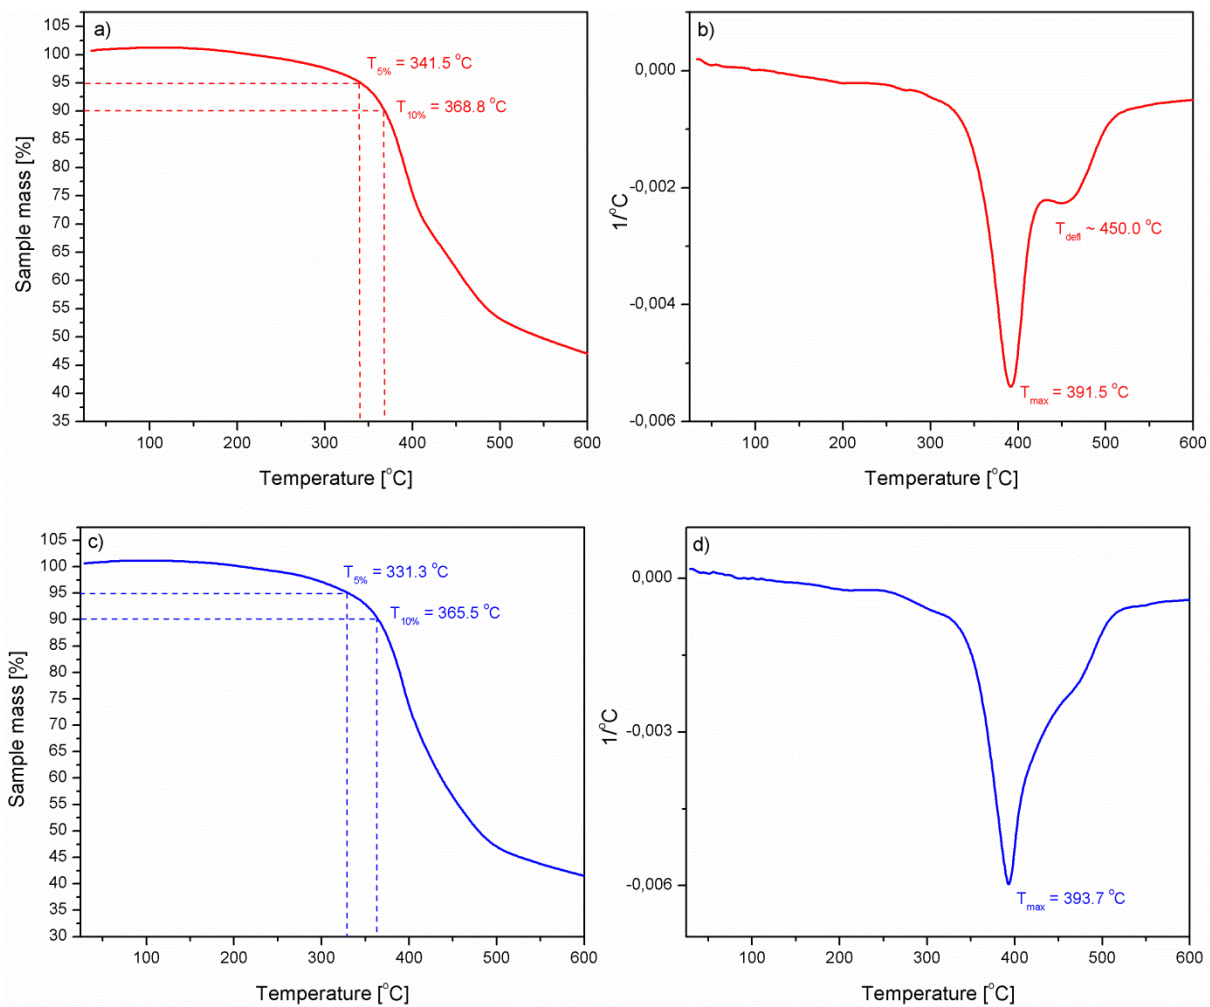

**Figure S2.** TGA (a, c) and DTG (b, d) curves of investigated compounds: PAZ-Carb-OMe (red lines) and PAZ-Carb-OOct (blue lines).
